# Supplementary material for: An Analysis of Sport-Specific Pain Symptoms through Inter-Individual Training Differences in CrossFit
Source: MDPI journal article supplement (doi:10.3390/sports9050068), 2021-05-19
Supplement: s1 [file s1]

Supplementary Materials

# An Analysis of Sport-Specific Pain Symptoms through Inter-Individual Training Differences in CrossFit

Maria A. Bernstorff <sup>1,\*</sup>, Norman Schumann <sup>2</sup>, Nader Maai <sup>1</sup>, Thomas A. Schildhauer <sup>1</sup> and Matthias Königshausen <sup>1</sup>

<sup>1</sup> Medical Department of Ruhr University of Bochum, University Hospital Bergmannsheil Bochum, Bürkle de la Camp-Platz 1, 44789 Bochum, Germany; maria.bernstorff@gmail.com (M.A.B.); nader.maai@bergmannsheil.de (N.M.); thomas.schildhauer@bergmannsheil.de (T.A.S.); matthias.königshausen@gmail.com (M.K.)

<sup>2</sup> Department of Mathematics, Ruhr-University Bochum, Universitätsstraße 150, 44801 Bochum, Germany; norman.schumann@ruhr-universität-bochum.de

\* Correspondence: maria.bernstorff@gmail.com; Tel.: (0049-1522-2926-817)

**Citation:** Bernstorff, M.A.; Schumann, N.; Maai, N.; Schildhauer, T.A.; Königshausen, M. An Analysis of Sport-Specific Pain Symptoms through Inter-Individual Training Differences in CrossFit. *Sports* **2021**, *9*, 68. <https://doi.org/10.3390/sports9050068>

**Publisher's Note:** MDPI stays neutral with regard to jurisdictional claims in published maps and institutional affiliations.

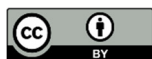

**Copyright:** © 2021 by the authors. Licensee MDPI, Basel, Switzerland. This article is an open access article distributed under the terms and conditions of the Creative Commons Attribution (CC BY) license (<http://creativecommons.org/licenses/by/4.0/>).

**Table S1.** Translated questionnaire: list of all questions recorded in the online questionnaire plus graphics to identify the individual pain regions.

| Athlete and Training Characteristics                                                                                                                                                                                                                                                                                                                                                                                                                                                                                                                                                                                                                                                                                                                                                                                                                                                                                                                                                                                                                                                                                                                                                                                                                                                                                                                                                                                                                                                                            |
|-----------------------------------------------------------------------------------------------------------------------------------------------------------------------------------------------------------------------------------------------------------------------------------------------------------------------------------------------------------------------------------------------------------------------------------------------------------------------------------------------------------------------------------------------------------------------------------------------------------------------------------------------------------------------------------------------------------------------------------------------------------------------------------------------------------------------------------------------------------------------------------------------------------------------------------------------------------------------------------------------------------------------------------------------------------------------------------------------------------------------------------------------------------------------------------------------------------------------------------------------------------------------------------------------------------------------------------------------------------------------------------------------------------------------------------------------------------------------------------------------------------------|
| <p>1) How many years have you been doing CrossFit?</p> <p>2) How many hours a week do you do CrossFit? (Enter your amount of training in hours / week)</p> <p>3) Do you take part in competitions? Yes/ No</p> <p>to 3) If yes: RX/advanced/scaled?</p> <p>4) Do you train according to a training plan designed for you?</p> <p>To 4) If so, by whom or how was the questionnaire drawn up? Personal Trainer/Online/Self Employed/Employed/Another Source</p> <p>To 4) If so, do you still take part in the course program of the box? Yes/No</p> <p>5) Do you warm up regularly before training? Yes/No</p> <p>6) Are you doing a cool down? Yes/now and then/never</p> <p>7) Include some of your 1 RM benchmarks: Backsquat/Frontsquat/Deadlift/Power Snatch/Strict Press/Power Clean</p> <p>8) Do you master: Strict pull-up/Kipping pull-up/Butterfly pull-up/Ring muscle-up/Bar muscle-up/Pistol squats/Handstand walk/Strict handstand push-up</p> <p>9) Do you do specific exercises for small muscle groups in addition to CrossFit? Yes/No</p> <p>To 9) If yes, tick for which muscle groups: rotator cuff/scapula retractors/hamstrings/gluteus medius</p> <p>10) Did you do any other sport regularly before CrossFit? Yes/No</p> <p>To 10) If so, which one?</p> <p>To 10) How many years did you do your main sport?</p> <p>To 10) Do you still do this sport? Yes/No</p> <p>To 10) Did you practice this sport as a competitive sport? or do you still do it as a competitive sport? Yes/No</p> |
| Sport-Specific Injuries                                                                                                                                                                                                                                                                                                                                                                                                                                                                                                                                                                                                                                                                                                                                                                                                                                                                                                                                                                                                                                                                                                                                                                                                                                                                                                                                                                                                                                                                                         |
| <p>11) Have you already had to pause your sport because of an injury you sustained while doing CrossFit? Yes/No</p> <p>12) Are you currently or have you had pain with individual CrossFit exercises in the past six months? Yes/No</p> <p>To 12) If so, state in the following question at which point this pain is or was. Please use the illustration below as a guide.</p> <p>To 12) If yes, tick where this pain is or was:</p> <p>1—hand, wrist/2—elbow/3—shoulders/4—neck, cervical spine/5—upper back, thoracic spine/6—lower back, lumbar spine/7—hips, hip joint/8—sacrumiliac joint, SIJ/9—knee /10—foot/11—ankle</p> <p>13) For each number ticked above, give the exercises in which you have or have had the pain / injuries?</p> <p>14) When you no longer have the pain, how did you get it under control?</p> <p>Omission of individual exercises/technique training of individual exercises/strength building in order to be able to perform certain exercises better/surgery/physiotherapy</p> <p>To 14) If an operation was necessary, which one?</p>                                                                                                                                                                                                                                                                                                                                                                                                                                       |

**Table S2.** Categorization of the one-repetition max (female): division of the given weights into five groups for better comparability with regard to the pain locations, N = number of athletes given their RM in this category.

| Exercise     | Group 1 | Group 2  | Group 3   | Group 4    | Group 5 |
|--------------|---------|----------|-----------|------------|---------|
| Backsquat    | <50kg   | 50–65 kg | 65–80 kg  | 80–95kg    | >95 kg  |
| N            | 19      | 29       | 48        | 55         | 39      |
| Frontsquat   | <50 kg  | 50–60 kg | 60–70 kg  | 70–80 kg   | >80 kg  |
| N            | 45      | 24       | 40        | 33         | 38      |
| Strict Press | <25 kg  | 25–30 kg | 30–35 kg  | 35–40 kg   | >40kg   |
| N            | 17      | 21       | 32        | 44         | 62      |
| Power Snatch | <20kg   | 20–30 kg | 30–40 kg  | 40–50 kg   | >50 kg  |
| N            | 7       | 18       | 48        | 68         | 36      |
| Power Clean  | <35 kg  | 35–45 kg | 45–55 kg  | 55–65 kg   | >65 kg  |
| N            | 19      | 22       | 36        | 54         | 53      |
| Deadlift     | <60 kg  | 60–80 kg | 80–100 kg | 100–120 kg | >120 kg |
| N            | 12      | 29       | 47        | 64         | 41      |

**Table S3.** Total number of athletes being capable of mastering certain skills.

| Mastered Skill    | N (Male) | N (Female) |
|-------------------|----------|------------|
| Strict Pul -up    | 182      | 127        |
| Kipping Pull-up   | 157      | 126        |
| Butterfly Pull-up | 81       | 36         |
| Ring Muscle-up    | 75       | 17         |
| Bar Muscle-up     | 94       | 20         |
| Pistol Squat      | 106      | 125        |
| Handstand Walk    | 63       | 39         |

**Table S4.** Number of athletes doing accessory exercises regularly.

| Accessory exercise        | N (male) | N (female) |
|---------------------------|----------|------------|
| Rotator cuff              | 80       | 75         |
| Shoulder blade retractors | 66       | 72         |
| Hamstrings                | 58       | 52         |
| Gluteus medius            | 38       | 43         |
